# Supplementary material
Source: HighWire-hosted journal article supplement (https://www.life-science-alliance.org/content/5/8/e202201390/F8)

Kikuchi\_Source data figure for Fig. 3

Fig. 3D

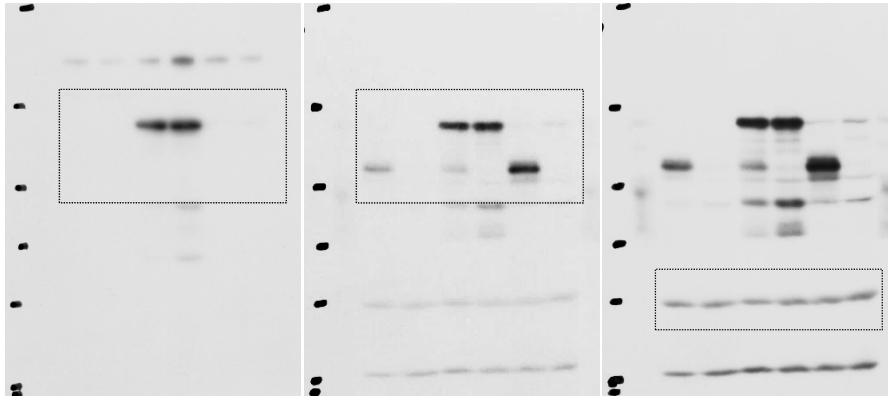

Supplement: inline-supplementary-material-3 [file inline-supplementary-material-3.pdf]
